# Supplementary material for: Monocyte Distribution Width, Neutrophil-to-Lymphocyte Ratio, and Platelet-to-Lymphocyte Ratio Improves Early Prediction for Sepsis at the Emergency
Source: MDPI journal article supplement (doi:10.3390/jpm11080732), 2021-07-28
Supplement: s1 [file s1]

Supplemental Materials.

Supplemental Table S1. Etiologies of Microorganisms

| Microorganisms                                       | Number     | Percentage (%) |
|------------------------------------------------------|------------|----------------|
| <b>Gram-negative bacili</b>                          | <b>250</b> | <b>63.0</b>    |
| <i>Escherichia coli</i>                              | 144        | 36.3           |
| <i>Klebsiella pneumoniae ssp pneumoniae</i>          | 27         | 6.8            |
| <i>Enterobacter cloacae complex</i>                  | 10         | 2.5            |
| <i>Proteus mirabilis</i>                             | 10         | 2.5            |
| <i>Pseudomonas aeruginosa</i>                        | 10         | 2.5            |
| <i>Bacteroides fragilis</i>                          | 6          | 1.5            |
| <i>Salmonella species</i>                            | 6          | 1.5            |
| <i>Klebsiella oxytoca</i>                            | 5          | 1.3            |
| <i>Aeromonas hydrophila</i>                          | 4          | 1.0            |
| <i>Acinetobacter baumannii/calcoaceticus complex</i> | 3          | 0.8            |
| <i>Citrobacter koseri</i>                            | 3          | 0.8            |
| <i>Serratia marcescens</i>                           | 3          | 0.8            |
| <i>Aeromonas caviae</i>                              | 2          | 0.5            |
| <i>Campylobacter coli</i>                            | 2          | 0.5            |
| <i>Enterobacter cloacae</i>                          | 2          | 0.5            |
| <i>Providencia rettgeri</i>                          | 2          | 0.5            |
| <i>Stenotrophomonas maltophilia</i>                  | 2          | 0.5            |
| <i>Acinetobacter baumannii</i>                       | 1          | 0.3            |
| <i>Bacteroides thetaiotaomicron</i>                  | 1          | 0.3            |
| <i>Campylobacter jejuni</i>                          | 1          | 0.3            |
| <i>Citrobacter freundii</i>                          | 1          | 0.3            |
| <i>Klebsiella pneumoniae</i>                         | 1          | 0.3            |
| <i>Klebsiella pneumoniae ssp ozaenae</i>             | 1          | 0.3            |
| <i>Leptotrichia goodfelloeii</i>                     | 1          | 0.3            |
| <i>Morganella morganii</i>                           | 1          | 0.3            |
| <i>Ralstonia pickettii</i>                           | 1          | 0.3            |
| <b>Gram-positive cocci</b>                           | <b>134</b> | <b>33.8</b>    |
| <i>Staphylococcus aureus</i>                         | 28         | 7.1            |
| <i>Staphylococcus capitis</i>                        | 20         | 5.0            |
| <i>Staphylococcus epidermidis</i>                    | 11         | 2.8            |
| <i>Staphylococcus hominis</i>                        | 11         | 2.8            |
| <i>Streptococcus dysgalactiae</i>                    | 8          | 2.0            |
| <i>Streptococcus agalactiae (Strep. group B)</i>     | 7          | 1.8            |
| <i>Enterococcus faecalis</i>                         | 5          | 1.3            |
| <i>Streptococcus anginosus</i>                       | 5          | 1.3            |
| <i>Staphylococcus haemolyticus</i>                   | 4          | 1.0            |
| <i>Staphylococcus pettenkoferi</i>                   | 4          | 1.0            |
| <i>Enterococcus faecium</i>                          | 3          | 0.8            |
| <i>Enterococcus casseliflavus</i>                    | 2          | 0.5            |
| <i>Lactococcus garvieae</i>                          | 2          | 0.5            |
| <i>Micrococcus luteus</i>                            | 2          | 0.5            |
| <i>Micromonas micros</i>                             | 2          | 0.5            |

|                                                          |           |             |
|----------------------------------------------------------|-----------|-------------|
| <i>Staphylococcus lugdunensis</i>                        | 2         | 0.5         |
| <i>Staphylococcus saprophyticus</i>                      | 2         | 0.5         |
| <i>Streptococcus agalactiae</i>                          | 2         | 0.5         |
| <i>Streptococcus gallolyticus</i>                        | 2         | 0.5         |
| <i>Streptococcus pyogenes</i> (Strep. group A)           | 2         | 0.5         |
| <i>Aerococcus viridans</i>                               | 1         | 0.3         |
| <i>Enterococcus hirae</i>                                | 1         | 0.3         |
| <i>Staphylococcus caprae</i>                             | 1         | 0.3         |
| <i>Streptococcus constellatus</i>                        | 1         | 0.3         |
| <i>Streptococcus cristatus</i>                           | 1         | 0.3         |
| <i>Streptococcus dysgalactiae</i> ssp <i>equisimilis</i> | 1         | 0.3         |
| <i>Streptococcus gordonii</i>                            | 1         | 0.3         |
| <i>Streptococcus mitis</i>                               | 1         | 0.3         |
| <i>Streptococcus oralis</i>                              | 1         | 0.3         |
| <i>Streptococcus vestibularis</i>                        | 1         | 0.3         |
| <b>Gram-positive bacilli</b>                             | <b>11</b> | <b>2.8%</b> |
| <i>Corynebacterium aurimucosum</i>                       | 2         | 0.5         |
| <i>Lactobacillus rhamnosus</i>                           | 2         | 0.5         |
| <i>Arcanobacterium haemolyticum</i>                      | 1         | 0.25        |
| <i>Corynebacterium afermentans</i>                       | 1         | 0.25        |
| <i>Corynebacterium argentoratense</i>                    | 1         | 0.25        |
| <i>Corynebacterium minutissimum</i>                      | 1         | 0.25        |
| <i>Corynebacterium striatum</i>                          | 1         | 0.25        |
| <i>Erysipelothrix rhusiopathiae</i>                      | 1         | 0.25        |
| <i>Solobacterium moorei</i>                              | 1         | 0.25        |
| <b>Yeast</b>                                             | <b>2</b>  | <b>2</b>    |
| <i>Candida glabrata</i>                                  | 2         | 0.5         |

Supplemental Table S2. SIRS Score Before and After Propensity Score Matching

| Variables       | Before PS matching (N = 8698) |              |         | After PS matching (N =1480) |             |         |
|-----------------|-------------------------------|--------------|---------|-----------------------------|-------------|---------|
|                 | Sepsis                        | Nonsepsis    | P value | Sepsis                      | Nonsepsis   | P value |
| Number (N)      | 308                           | 8390         |         | 296                         | 1184        |         |
| Mean SIRS score | 2.6 ± 0.7                     | 1.1 ± 1.0    | <0.001  | 2.5 ± 0.6                   | 1.2 ± 1.0   | <0.001  |
| SIRS score ≥ 1  | 308 (100%)                    | 5528 (65.9%) | <0.001  | 296 (100%)                  | 843 (71.2%) | <0.001  |
| SIRS score ≥ 2  | 308 (100%)                    | 2540 (30.3%) | <0.001  | 296 (100%)                  | 452 (38.2%) | <0.001  |
| SIRS score ≥ 3  | 141(45.8%)                    | 691 (8.2%)   | <0.001  | 133 (44.9%)                 | 154 (13.0%) | <0.001  |
| SIRS score ≥ 4  | 27 (8.8%)                     | 61 (0.7%)    | <0.001  | 24 (8.1%)                   | 19 (1.6%)   | <0.001  |

Abbreviations: SIRS, Systemic Inflammatory Response Syndrome; N, number; PS, propensity score.

Supplemental Table S3. Diagnostics for SIRS Score Before and After Propensity Score Matching

| Variables      | Before PS matching (N = 8698) |             | After PS matching (N =1480) |             |
|----------------|-------------------------------|-------------|-----------------------------|-------------|
|                | Sensitivity                   | Specificity | Sensitivity                 | Specificity |
| SIRS score ≥ 1 | 100.0%                        | 34.1%       | 100.0%                      | 28.8%       |
| SIRS score ≥ 2 | 100.0%                        | 69.7 %      | 100.0%                      | 61.8 %      |
| SIRS score ≥ 3 | 45.8%                         | 91.8%       | 44.9%                       | 87.0%       |
| SIRS score ≥ 4 | 8.8%                          | 99.3%       | 8.1%                        | 98.4%       |

Abbreviations: SIRS, Systemic Inflammatory Response Syndrome; N, number; PS, propensity score.
